# Supplementary material for: Organic bromide-assisted one-pot synthesis of Bi2S3 nanorods using DMSO as a sulfur supply
Source: Royal Society of Chemistry journal article supplement (doi:10.1039/d2ce00568a), 2022-01-01
Supplement: d2ce00568a1.pdf [file d2ce00568a1.pdf]

## Supplementary Information

**Organic bromide-assisted one-pot synthesis of Bi<sub>2</sub>S<sub>3</sub> nanorods using DMSO as a sulfur supply**

Sukjun Lee, Min Seop Kim, Hyesung Lee, and Sang-Yup Lee\*

Department of Chemical and Biomolecular Engineering, Yonsei University,

50 Yonsei-ro, Seodaemun-gu, Seoul 03722 Korea

## 1. XPS analysis of $\text{Bi}_2\text{S}_3$ nanorods

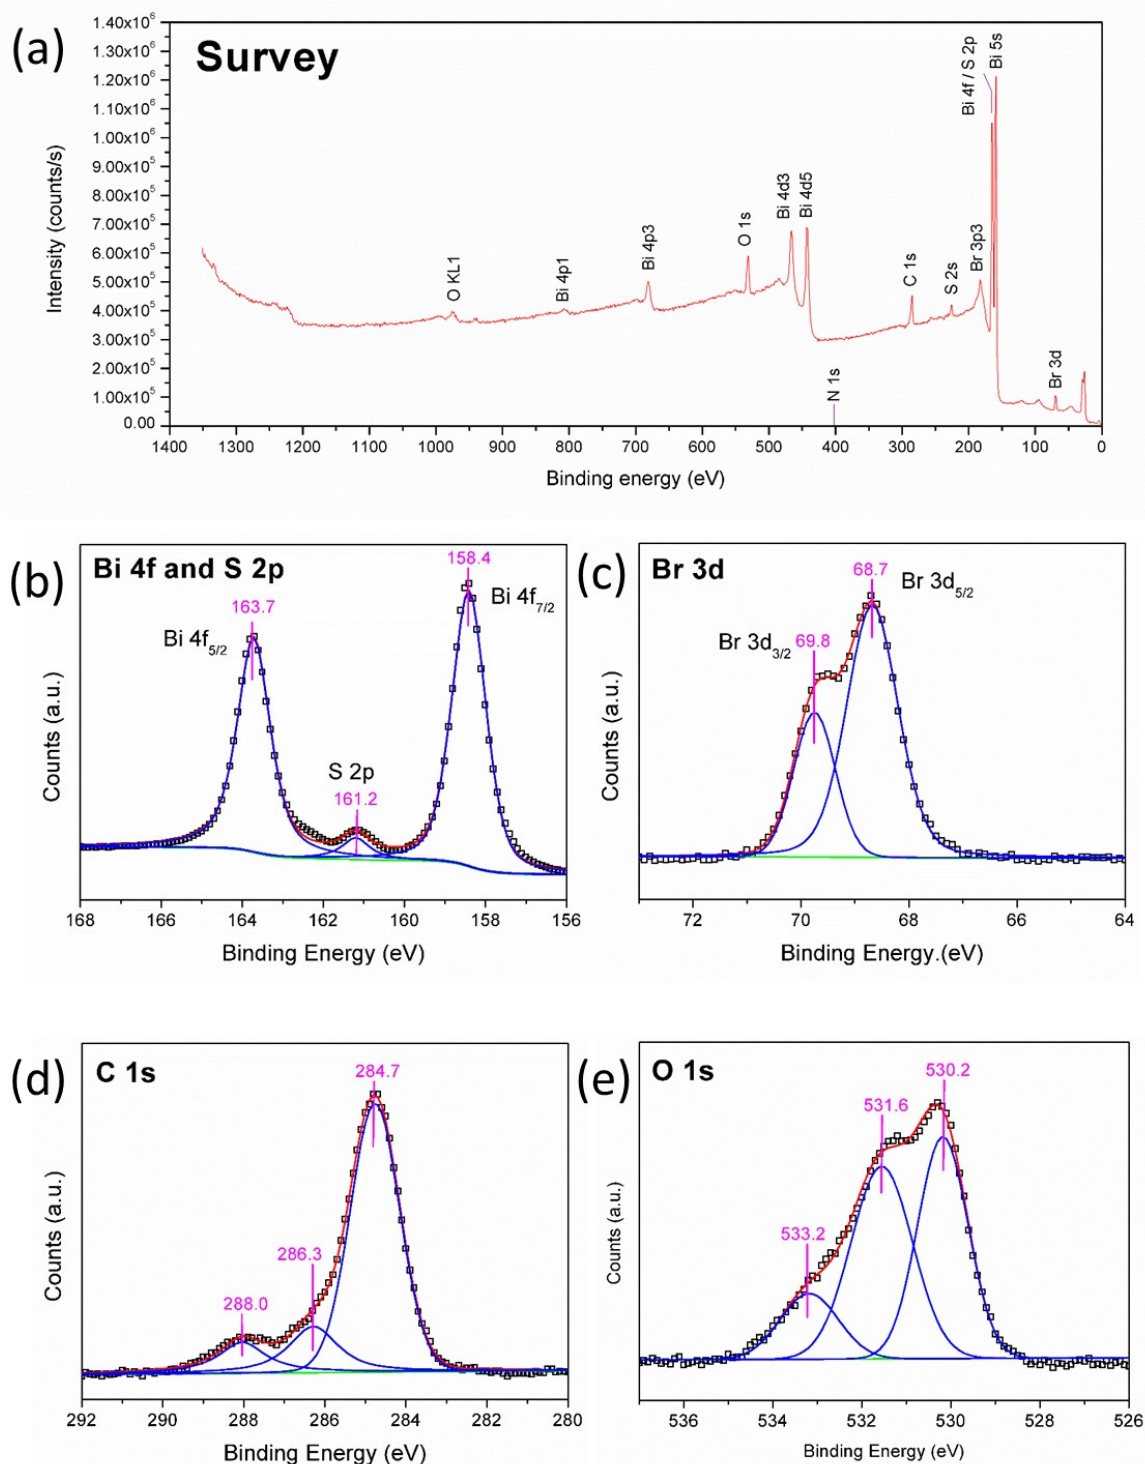

**Figure S1.** The XPS survey spectra of  $\text{Bi}_2\text{S}_3$  nanorods prepared with  $\text{Et}_4\text{NBr}$ . (a) XPS survey showing the presence of C, O, and Br traces, along with the major components of Bi and S, (b-e) high-resolution XPS spectra of Bi4f/ S 2p, Br 3d, C 1s, and O 1s.

**Table S1.** Assignment of the high resolution XPS peaks of each element

| Element | Binding energy (eV) | XPS signal           | Chemical bond                                      | Ref.    |
|---------|---------------------|----------------------|----------------------------------------------------|---------|
| Bi      | 158.4               | Bi 4f <sub>7/2</sub> | Bi <sup>3+</sup> in BiOBr                          | 1, 2    |
|         | 163.7               | Bi 4f <sub>5/2</sub> | Bi <sup>3+</sup> in Bi <sub>2</sub> S <sub>3</sub> | 1       |
| S       | 161.2               | S 2p                 | -                                                  | 1, 3    |
| Br      | 68.7                | Br 3d <sub>5/2</sub> | Free Br                                            | 4       |
|         | 69.8                | Br 3d <sub>3/2</sub> | Alkyl bromide                                      | 4, 5    |
| C       | 284.7               | C 1s                 | C-C or C=C                                         | 6       |
|         | 286.3               | C 1s                 | C-O / C-OH                                         | 6, 7, 9 |
|         | 288.0               | C 1s                 | C=O                                                | 7       |
| O       | 530.2               | O 1s                 | Chemisorbed atomic O                               | 8       |
|         | 531.6               | O 1s                 | Lattice oxygen of BiOBr                            | 1       |
|         | 533.2               | O 1s                 | Hydroxyl                                           | 9       |

[1] H.-P. Jiao, X. Yu, Z.-Q. Liu, P.-Y. Kuang, Y.-M. Zhang, *RSC Adv.* **2015**, 5, 16239-16249.

[2] J. Xu, L. Li, C. Guo, Y. Zhang, W. Meng, *Appl. Catal. B* **2013**, 130, 285-292.

[3] Z.-Q. Liu, W.-Y. Huang, Y.-M. Zhang, Y.-X. Tong, *CrystEngComm* **2012**, 14, 8261-8267.

[4] M. K. Rabchinskii, S. A. Ryzhkov, D. A. Kirilenko, N. V. Ulin, M. V. Baidakiva, V. V. Shnitov, S. I. Pavlov, R. G. Chumakov, D. Y. Stolyarova, N. A. Basedina, A. V. Shvidchenko, D. V. Potorochin, F. Roth, D. A. Smirnov, M. V. Gudkov, M. Brzhezinskaya, O. I. Lebedev, V. P. Melnikov, P. N. Brunkov, *Sci. Rep.* **2020**, 10, 6902.

[5] S. Yuan, G. Xiong, F. He, W. Jiang, B. Liang, C. Choong, *J. Mater. Chem. B* **2015**, 3, 8088-8101.

[6] K. Ranganathan, A. Morais, I. Nongwe, C. Longo, A. F. Nogueira, N. J. Coville, *J. Mol. Catal. A* **2016**, 422, 165-174.

[7] M. B. Hahn, P. M. Dietrich, J. Radnik, *Commun. Chem.* 2021, 4, 50

[8] F. J. Williams, D. P. C. Bird, A. Palermo, A. K. Santra, R. M. Lambert, *J. Am. Chem. Soc.* **2004**, 126, 8509-8514.

[9] D. Koushik, W. J. H. Verhees, D. Zhang, Y. Kuang, S. Veenstra, M. Creatore, R. E. I. Schropp, *Adv. Mater. Interfaces* **2017**, 4, 1700043.

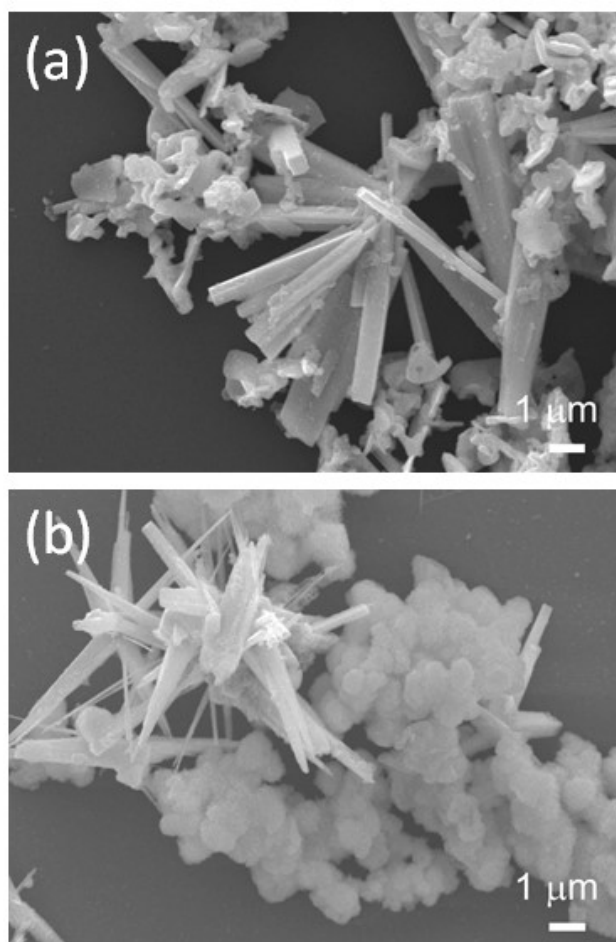

**Figure S2.** SEM images of Bi<sub>2</sub>S<sub>3</sub> products synthesized with the use of KBr as a bromide source. Each image shows (a) microrods and (b) particulate aggregates.

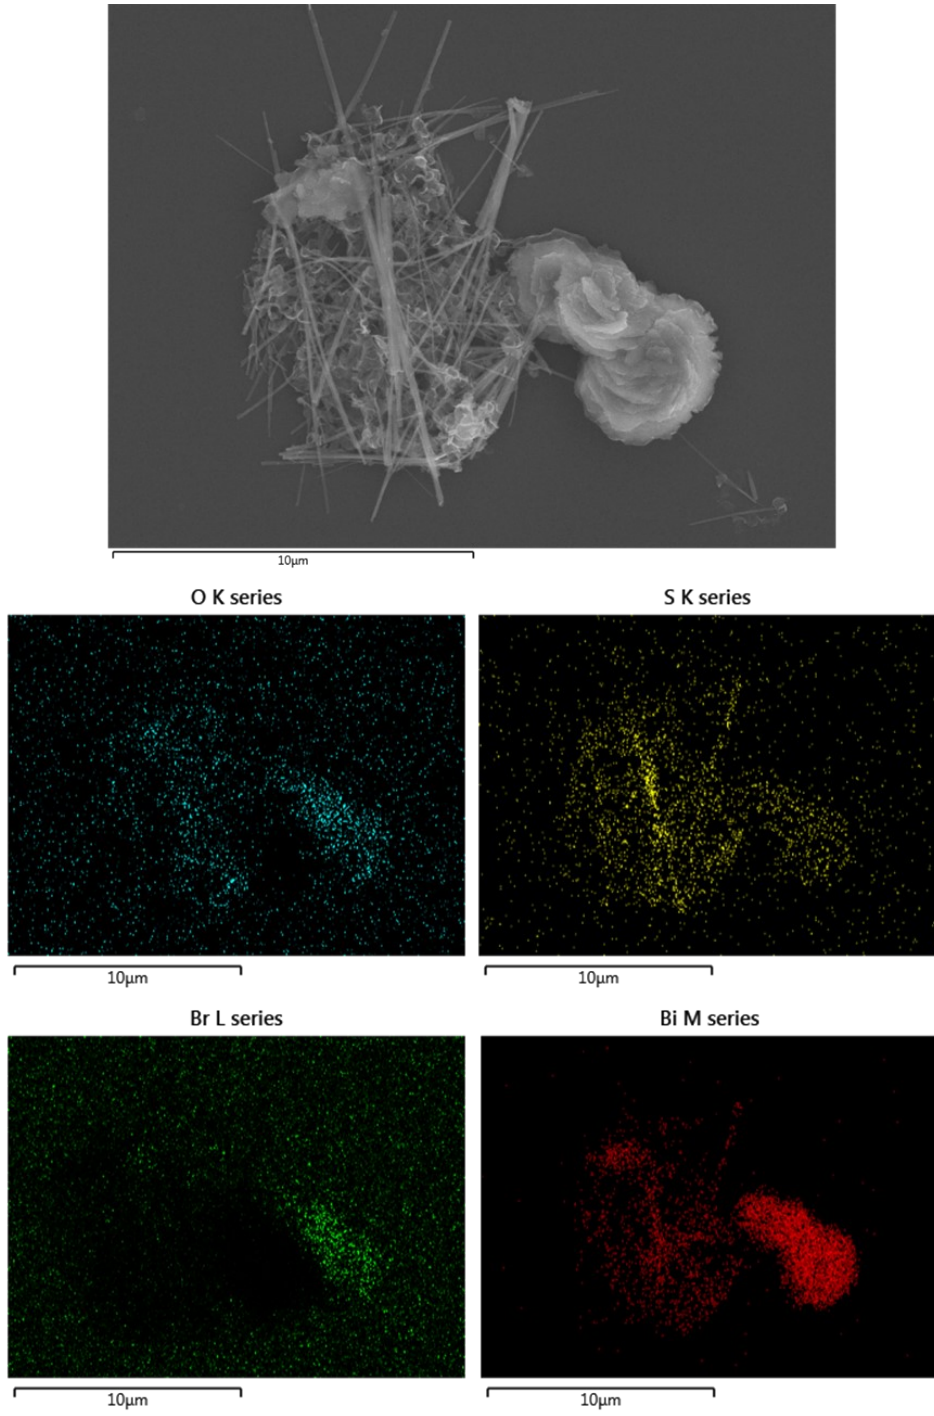

**Figure S3.** SEM image and corresponding atomic mapping of the BiOBr and Bi<sub>2</sub>S<sub>3</sub> mixture.

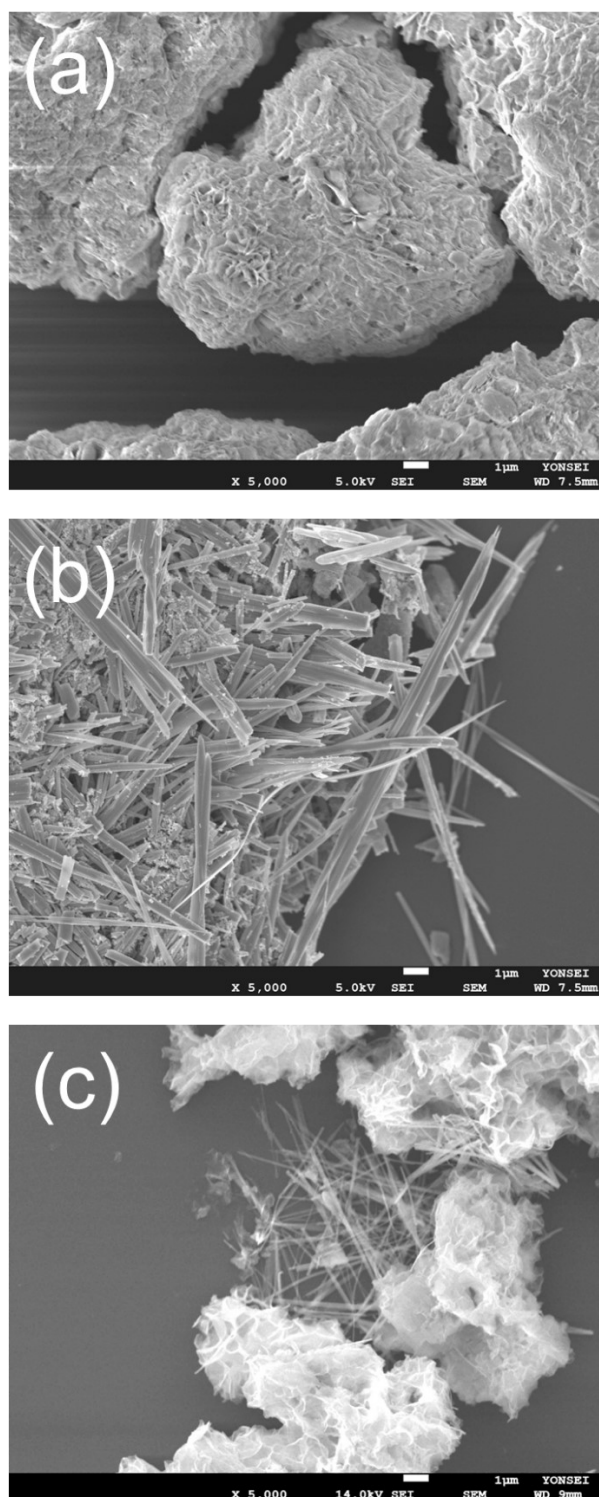

**Figure S4.** SEM images of Bi products prepared under various synthesis protocols (scale bars: 1 μm). (a) BiOBr prepared by Et<sub>4</sub>NBr is reacted further with DMSO in the presence of KBr, (b) BiOBr prepared by Et<sub>4</sub>NBr is reacted further without any bromide source, (c) Bi species prepared by KBr is reacted further with DMSO in the presence of Et<sub>4</sub>NBr.

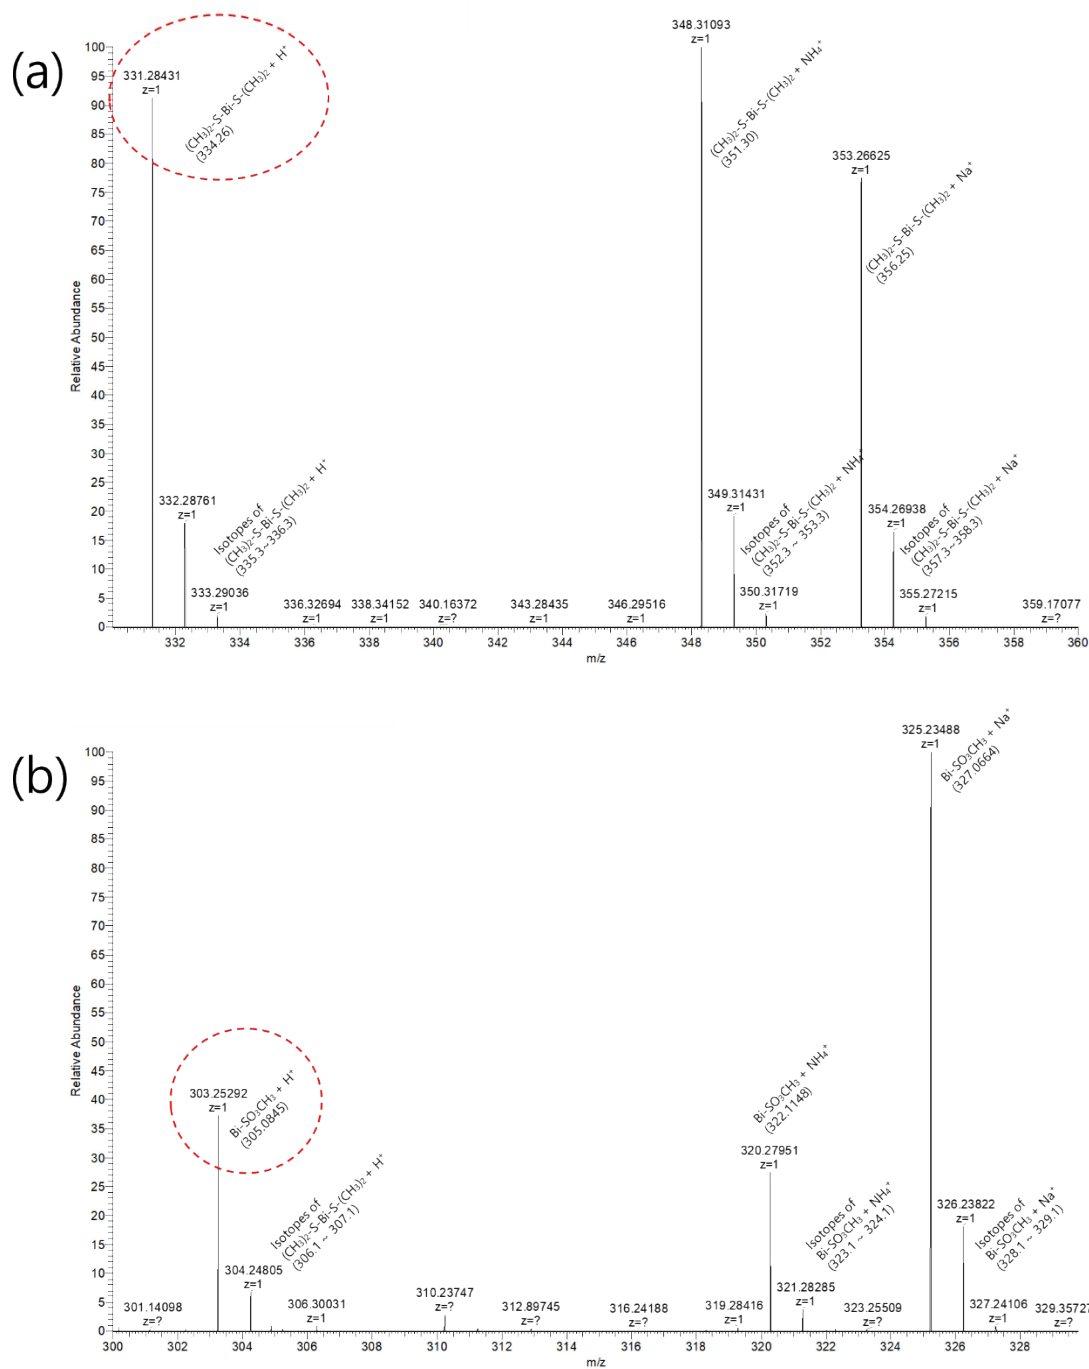

**Figure S5.** LC-Mass spectra of the reaction intermediates. Characteristic peaks are marked with dotted red circles. (a)  $m/z = 331.28$  is assigned to  $(\text{CH}_3)_2\text{S-Bi-S}(\text{CH}_3)_2$ . Peaks of  $m/z = 348.31$  and  $353.27$  are assigned to  $(\text{CH}_3)_2\text{S-Bi-S}(\text{CH}_3)_2$  species combined with  $\text{NH}_4$  and  $\text{Na}^+$ , respectively. Each peak has subordinate peaks originating from the sulfur isotopes. (b)  $m/z = 303.25$  assigned to  $\text{Bi-SO}_3\text{CH}_3$ . Peaks of  $m/z = 320.28$  and  $325.23$  are also assigned to  $\text{Bi-SO}_3\text{CH}_3$  species combined with  $\text{NH}_4$  and  $\text{Na}^+$ , respectively. Each peak has subordinate peaks originating from the sulfur isotopes.

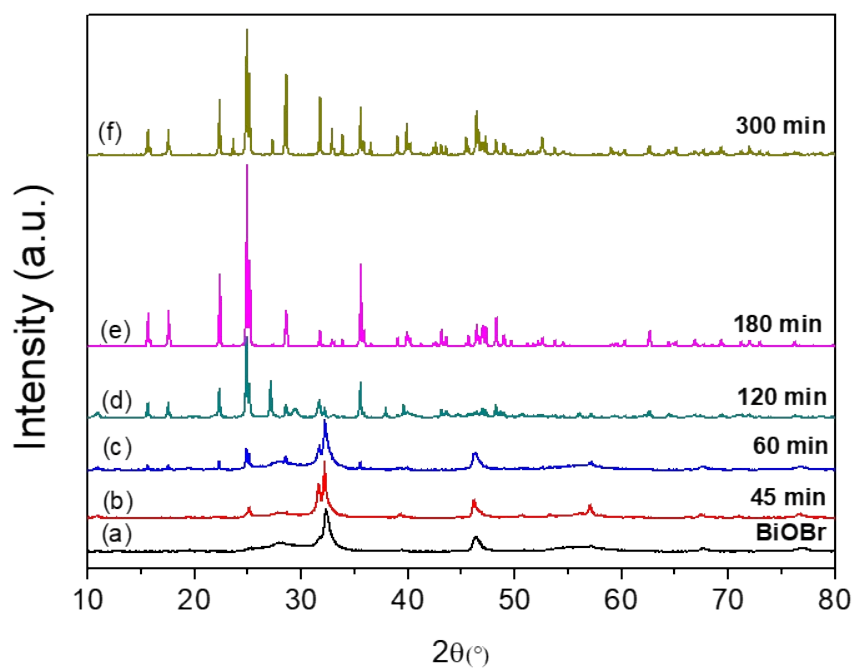

**Figure S6.** X-ray diffraction patterns showing the transformation of BiOBr to  $\text{Bi}_2\text{S}_3$  with the reaction time



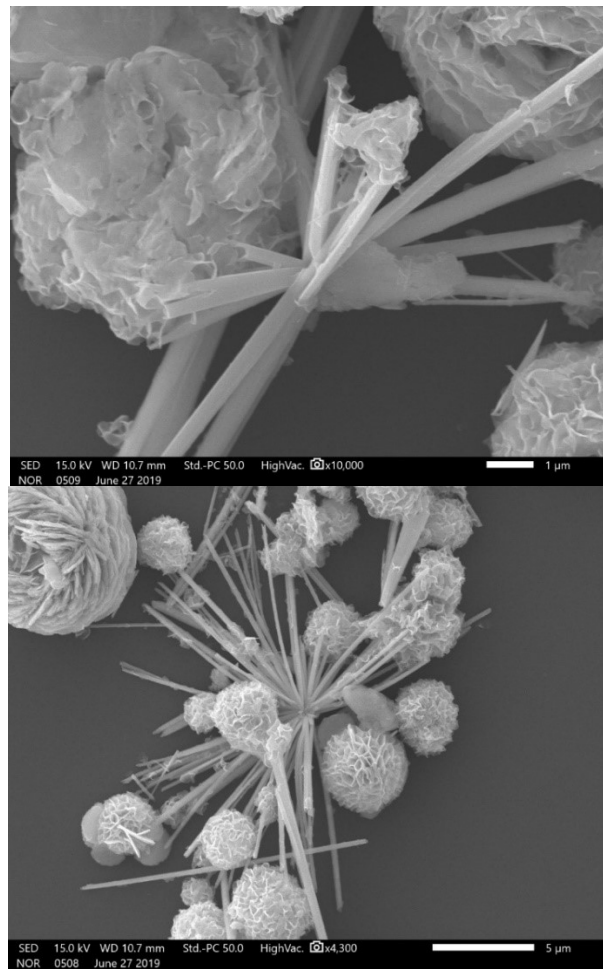

**Figure S7.** Radial growth of  $\text{Bi}_2\text{S}_3$  nanorods from the BiOBr microspheres. Images were taken at different magnifications.

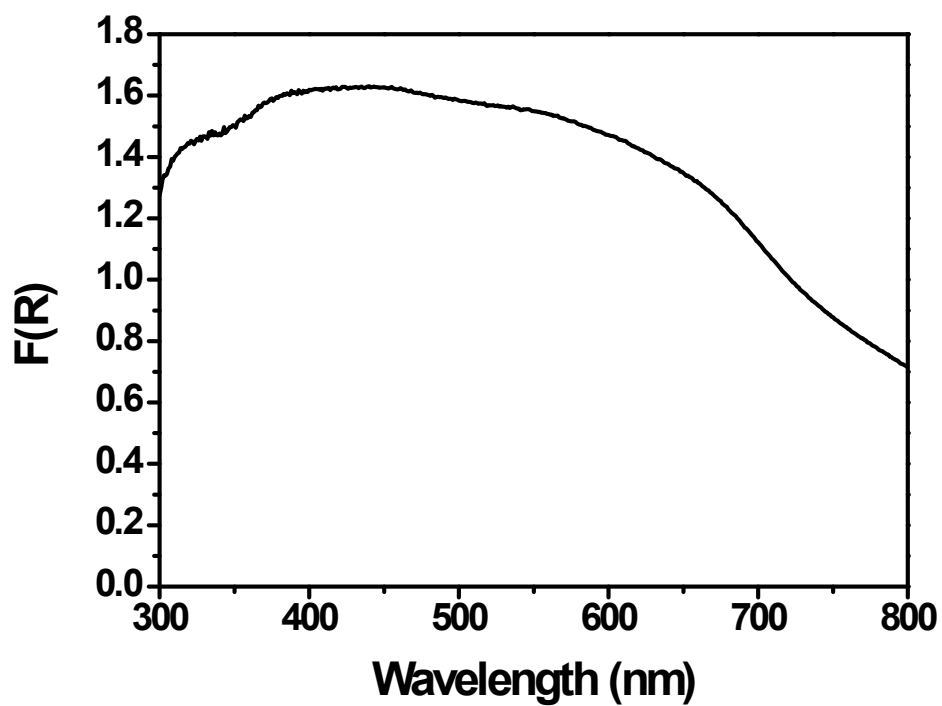

Figure S8. UV-vis-DRS absorbance spectrum of Bi<sub>2</sub>S<sub>3</sub>.

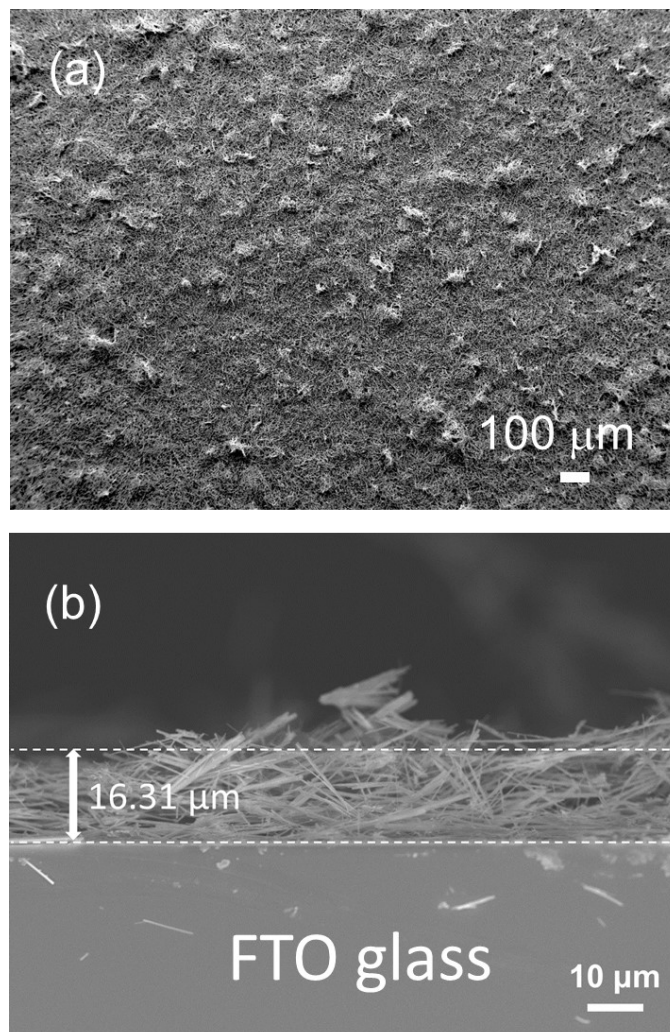

**Figure S9.** SEM images of the Bi<sub>2</sub>S<sub>3</sub> nanorods layer deposited on the FTO glass. (a) top and (b) cross-section views.

**Table S2.** Comparison of the photo-response time of the Bi<sub>2</sub>S<sub>3</sub> photodetectors

| Morphology                         | Synthesis method (reaction temp., time)                  | Bi & S sources / Solvent*                                                                                                              | Band gap energy (eV) | Response time (ms) | Decay time (ms) | Ref. (reference in the manuscript)        |
|------------------------------------|----------------------------------------------------------|----------------------------------------------------------------------------------------------------------------------------------------|----------------------|--------------------|-----------------|-------------------------------------------|
| Nanotube                           | Aerosol assisted CVD (deposition on FTO glass)           | Bi <sub>2</sub> [S <sub>2</sub> CN(C <sub>2</sub> H <sub>5</sub> ) <sub>2</sub> ] <sub>3</sub> / chloroform, dichloromethane           | 1.8                  | n/a                | 20,000~25,000   | Chem. Mater. 2010, 22, 5084-5092 (Ref 3)  |
| Nanorods (grown like a sea urchin) | Hydrothermal (150 °C, 6 h)                               | Bi(NO <sub>3</sub> ) <sub>3</sub> •5H <sub>2</sub> O, thiourea / ethylene glycol, water, ethylene diamine                              | 1.62                 | 177                | 907             | CrystEngComm 2013, 15, 6611-6616 (Ref 7)  |
| Microcrystals                      | Solvothermal with oleic acid (180 °C, 2 h)               | Bi(CH <sub>3</sub> CO <sub>2</sub> ) <sub>3</sub> , S powder / 1-octadecene, oleic acid                                                | 1.9                  | 500                | 800             | RSC Adv 2012, 2, 234-240 (Ref 12)         |
| Nanorod                            | Solvothermal with alkylamines (160 °C, 1 h)              | BiCl <sub>3</sub> , S powder / organic amine                                                                                           | 1.89                 | 300-600            | 700-900         | CrystEngComm 2017, 19, 727-733 (Ref 42)   |
| Nanosheet                          | Solvothermal (180 °C, 8 h)                               | Triphenyl bismuth, dibenzyl disulfide / oleylamine, ethanol, PVP                                                                       | 1.9                  | 0.01               | 0.35            | Small 2015, 11, 2848-2855 (Ref 43)        |
| Short nanorod                      | Solvothermal with oleic acid (170 °C 0.5 h + 100 °C 2 h) | Bi(CH <sub>3</sub> CO <sub>2</sub> ) <sub>3</sub> , [(CH <sub>3</sub> ) <sub>3</sub> Si] <sub>2</sub> S / 1-octadecene, oleic acid     | 1.3                  | ~300               | ~300            | Nano Lett. 2008, 8, 4002-4006 (Ref 44)    |
| Nanorod                            | Hydrothermal (130 °C, 9 h)                               | Bi(NO <sub>3</sub> ) <sub>3</sub> •5H <sub>2</sub> O, thiourea / water, NH <sub>3</sub> •H <sub>2</sub> O, EDTA                        | n/a                  | 372                | 386             | Front. Optoelectron. 2015, 8, 282-288     |
| Nanorod                            | Molten salt solvent                                      | Bi(NO <sub>3</sub> ) <sub>3</sub> •5H <sub>2</sub> O, Na <sub>2</sub> S•9H <sub>2</sub> O / LiNO <sub>3</sub> +KNO <sub>3</sub> (melt) | n/a                  | < 100              | < 100           | Solid State Comm. 2009, 43-44,, 1894-1896 |
| Sea urchin-like structure          | Solvothermal (60 °C, 24 h)                               | Bi(NO <sub>3</sub> ) <sub>3</sub> •5H <sub>2</sub> O, thiourea / ethylene glycol, PVP                                                  | n/a                  | 142                | 151             | Nanoscale Res. Lett. 2015, 10, 286        |
| Sea urchin-like structure          | Hydrothermal (120 °C, 6 h)                               | Bi(NO <sub>3</sub> ) <sub>3</sub> •5H <sub>2</sub> O, thiourea / water                                                                 | n/a                  | 50                 | 240             | RSC Adv. 2012, 2, 6258-6261               |
| Nanorod                            | Solvothermal (180 °C)                                    | Bi(NO <sub>3</sub> ) <sub>3</sub> •5H <sub>2</sub> O / DMSO, Et <sub>4</sub> NBr                                                       | 1.5                  | 920                | 9700            | This work                                 |

\*Major solvent is written in blue. Other additives including capping agents are written in green
